# Supplementary material for: SepG coordinates sporulation-specific cell division and nucleoid organization in Streptomyces coelicolor
Source: PubMed Central journal article supplement (PMC4852450; doi:10.1098/rsob.150164), 2016-04-06
Supplement: rsob150164supp1.pdf [file rsob150164supp1.pdf]

## SUPPLEMENTAL INFORMATION

Belonging to the manuscript:

**SepG coordinates sporulation-specific cell division and nucleoid organization  
in *Streptomyces coelicolor***

Le Zhang\*, Joost Willemse\*, Dennis Claessen and Gilles P. van Wezel<sup>#</sup>

Molecular Biotechnology, Institute of Biology, Leiden University, PO Box 9505,  
2300RA, Leiden, The Netherlands

\* These authors contributed equally to this work

<sup>#</sup>To whom correspondence should be addressed. Tel: +3171527430; email:

g.wezel@biology.leidenuniv.nl

**Table S1.** Bacterial strains.

| <b>Bacterial strains</b> | <b>Genotype</b>                                 | <b>Reference</b> |
|--------------------------|-------------------------------------------------|------------------|
| <i>E. coli</i> JM109     | See reference                                   | [1]              |
| <i>E. coli</i> ET12567   | See reference                                   | [2]              |
| M145                     | <i>S. coelicolor</i> A3(2) SCP1- SCP2-          | [3]              |
| K202                     | M145 + KF41                                     | [4]              |
| GAL1                     | M145 $\Delta$ <i>ylmG</i>                       | This work        |
| GAL2                     | M145 + pGWS755                                  | This work        |
| GAL3                     | GAL1 + KF41                                     | This work        |
| GAL4                     | GAL1 + pGWS116                                  | This work        |
| GAL5                     | GAL1 + pGWS526                                  | This work        |
| GAL7                     | GAL1 + pGWS755                                  | This work        |
| GSA3                     | M145 $\Delta$ <i>ssgA</i> (:: <i>aadA</i> )     | [5]              |
| GSB1                     | M145 $\Delta$ <i>ssgB</i> (:: <i>aac(3)IV</i> ) | [6]              |
| GAL93                    | GAL1 + pGWS771                                  | This work        |
| GAL94                    | M145 + pGWS791 + pGWS116                        | This work        |
| GAL95                    | M145 + pGWS791 + pGWS526                        | This work        |
| GAL96                    | M145 + pGWS755 + pGWS529                        | This work        |
| GAL102                   | M145 + pGWS526 + pGWS527                        | This work        |
| GAL103                   | M145 + pGWS755 + GAPp- <i>mCherry</i>           | This work        |

**Table S2.** Plasmids and constructs.

| Plasmid and constructs | Description                                                                                                                                                                  | Reference |
|------------------------|------------------------------------------------------------------------------------------------------------------------------------------------------------------------------|-----------|
| pGWS116                | pHJL401 harbouring SsgA-eGFP                                                                                                                                                 | [7]       |
| pGWS526                | pHJL401 harbouring SsgB-eGFP                                                                                                                                                 | [8]       |
| pGWS527                | pSET152 harbouring FtsZ-mCherry behind the nativeftsZ promoter                                                                                                               | This work |
| pGWS529                | pHJL401 expressing FtsZ-mCherry from the <i>S. coelicolor</i> ftsZ promoter.                                                                                                 | This work |
| pGWS725                | pWHM3 with XbaI site removed from the multiple cloning site.                                                                                                                 | This work |
| pGWS731                | pWHM3 containing around 1.5 kb flanking regions of <i>S. coelicolor</i> SCO2078 with apra-loxP inserted in between.                                                          | This work |
| pGWS755                | pSET152 harbouring the <i>ylmG-egfp</i> under the control of the <i>S. coelicolor</i> ftsZ promoter region                                                                   | This work |
| pGWS756                | pHJL401 harbouring the <i>ylmG-egfp</i> under the control of the <i>S. coelicolor</i> ftsZ promoter region                                                                   | This work |
| pGWS771                | pSET152 harbouring the +1/+294 region of <i>ylmG</i> under the control of the ftsZ promoter region of <i>S. coelicolor</i> .                                                 | This work |
| pGWS791                | pSET152 with <i>ylmG-mCherry</i> under the control of the ftsZ promoter region of <i>S. coelicolor</i>                                                                       | This work |
| pGWS793                | pSET152 harbouring <i>sepG-blaM</i> under the control of the <i>S. coelicolor</i> ftsZ promoter region                                                                       | This work |
| pGWS794                | As pGWS794 but expressing the N-terminal part of SepG fused to BlaM                                                                                                          | This work |
| pGWS795                | As pGWS794 but expressing the C-terminal part of SepG fused to BlaM                                                                                                          | This work |
| pGWS796                | As pGWS794 but expressing full-length BlaM                                                                                                                                   | This work |
| pGWS797                | As pGWS794 but expressing mature BlaM (no signal peptide)                                                                                                                    | This work |
| pHJL401                | <i>E. coli</i> / <i>Streptomyces</i> shuttle vector, low copy (<5 copies per chromosome) in <i>Streptomyces</i> and high copy (>100 copies per chromosome) in <i>E. coli</i> | [9]       |
| pKF41                  | Integrative construct based on pSET152 expressing ftsZ-egfp from the <i>S. coelicolor</i> ftsZ promoter region                                                               | [4]       |
| pKT25                  | BACTH plasmid harboring the T18 fragment of                                                                                                                                  | [10]      |

|          |                                                                                                                                                                                  |      |
|----------|----------------------------------------------------------------------------------------------------------------------------------------------------------------------------------|------|
|          | the<br>Bordetella pertussis <i>cya</i> gene.                                                                                                                                     |      |
| pSET152  | <i>E. coli</i> / <i>Streptomyces</i> shuttle vector, around 100 copies per chromosome in <i>E. coli</i> and integrative in the $\phi$ C31 attachment site in <i>Streptomyces</i> | [11] |
| pUWL-Cre | Plasmid harboring Cre-recombinase                                                                                                                                                | [12] |
| pWHM3    | <i>E. coli</i> / <i>Streptomyces</i> shuttle vector, around 100 copies per chromosome in both <i>E. coli</i> and <i>Streptomyces</i> .                                           | [13] |

**Table S3.** Oligonucleotides.

| Name         | 5'-3' sequence #                                                                           |
|--------------|--------------------------------------------------------------------------------------------|
| ylmG_LF-1442 | GTCAGA <b><u>AATTC</u></b> GC GGGACGATGTGCGCATTCTCTCG                                      |
| ylmG_LR+6    | GTCAGAAGTTATCCATCACCC <b><u>TCTAGA</u></b> GCTCATGACCTGTGCTTCCCTCTC                        |
| ylmG_RF+277  | GTCAGAAGTTATCGCGCATC <b><u>TCTAGA</u></b> CAGCTGTGAGCGATGAGAGAGATAC                        |
| ylmG_RR+1521 | GTCAG <b><u>GATCC</u></b> TCGATCAGGAACCCGCGCATCGGC                                         |
| ylmG_F+1     | GTCAGAATTC <b><u>AGGCCT</u></b> TCGACATGAGCGTGGTCCTGGATGTC                                 |
| ylmG_R+282   | GTCAAAGCTT <b><u>GGATCC</u></b> AGCTGGCTCACGATCGAGAT                                       |
| ylmG_R+294   | GCTAG <b><u>GATCC</u></b> TCTCATCGCTCACAGCTGGCT                                            |
| BlaM_F_EB    | ctgaGAATTC <b><u>GGATCC</u></b> GGCGGTTCCACATGCTATAAGTTCCAGCCCATTACGCCACCCAGAAACGCTGGTGAAA |
| BlaM_R_XH    | ctgaAAGCTT <b><u>TCTAGATTACCAATGCTTAATCAGTGAGGC</u></b>                                    |
| YlmG_R+120   | ctgaAAGCTT <b><u>GGATCC</u></b> GCCTTGCCGGGTTGC                                            |
| YlmG_F+121   | ctgaGAATTC <b><u>AGGCCT</u></b> TCGACATGGTGGTCGTTCTGGAGGCCA                                |
| BlaM_F+1_ES  | ctgaGAATTC <b><u>AGGCCT</u></b> TCGACATGAGTATTCAACATTTCCGT                                 |
| BlaM_F+70_ES | ctgaGAATTC <b><u>AGGCCT</u></b> TCGACATGCACCCAGAAACGCTGGTGAAA                              |

# Restriction sites used for cloning are underlined and in bold face. GGATCC, BamHI; GAATTC, EcoRI; AGGCCT, StuI; TCTAGA, XbaI; AAGCTT, HindIII. Sequence shadowed in grey encoded the 12 amino acids linker between SepG and BlaM or FtsZ and BlaM

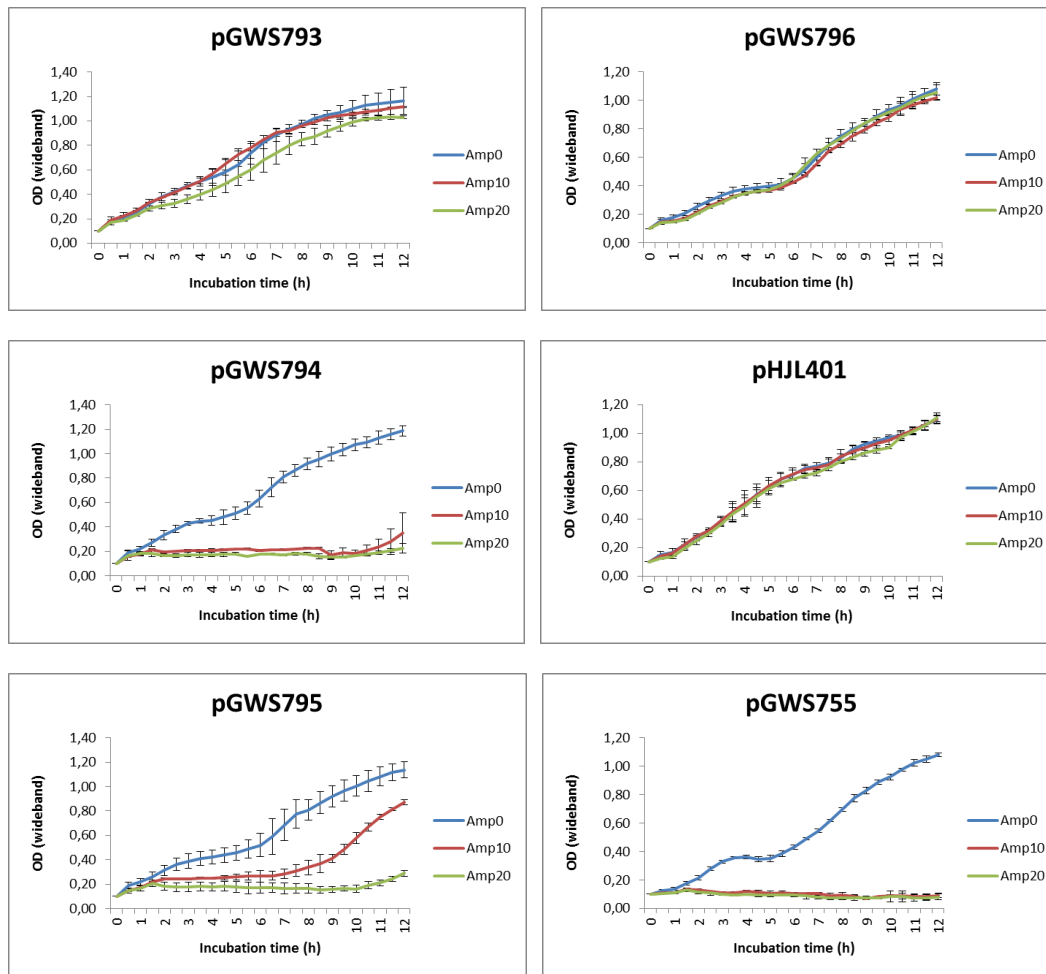

**Figure S1. Growth curves of *E. coli* JM109 carrying plasmids expressing different BlaM fusions.** The graphs belong to Figure 8 of the manuscript. The BlaM fusions were: full-length SepG-BlaM (pGWS793); N-terminal SepG<sub>1-40</sub>-BlaM (pGWS794; first TM domain of SepG); C-terminal SepG<sub>41-94</sub>-BlaM (pGWS795; second TM domain of SepG); BlaM with signal sequence expressed from the *ftsZ* promoter(s) (pGWS796; positive control); BlaM with signal sequence expressed from its native promoter (pHJL401; positive control); and pGWS755 expressing SepG-eGFP (pGWS755; negative control). Transformants were grown in presence of 0, 10 or 20 µg/ml ampicillin. Growth curve for each strain was measured every 30 minutes for 12 h at 37°C. Cultures were obtained for three independent transformants (and each of these in triplicate) using a Bioscreen C microtitre system with automated biomass reading.

## REFERENCES TO SUPPLEMENTAL DATA

1. Sambrook J, Fritsch E, Maniatis T. 1989 *Molecular cloning: a laboratory manual.*: New York: Cold spring harbor laboratory press.
2. MacNeil DJ, Gewain KM, Ruby CL, Dezeny G, Gibbons PH, Maeneil T. 1992 Analysis of *Streptomyces avermitilis* genes required for avermectin biosynthesis utilizing a novel integration vector. *Gene*. **111**, 61-68.
3. Kieser T, Bibb MJ, Buttner MJ, Chater KF, Hopwood DA. 2000 *Practical Streptomyces genetics.*: John Innes Foundation.
4. Grantcharova N, Lustig U, Flärdh K. 2005 Dynamics of FtsZ assembly during sporulation in *Streptomyces coelicolor* A3(2). *Journal of bacteriology*. **187**, 3227-3237.
5. van Wezel GP, van der Meulen J, Kawamoto S, Luiten RG, Koerten HK, Kraal B. 2000 SsgA is essential for sporulation of *Streptomyces coelicolor* A3(2) and affects hyphal development by stimulating septum formation. *Journal of bacteriology*. **182**, 5653-5662.
6. Keijser BJF, Noens EE, Kraal B, Koerten HK, van Wezel GP. 2003 The *Streptomyces coelicolor* *ssgB* gene is required for early stages of sporulation. *FEMS Microbiol. Lett.* **225**, 59-67.
7. Noens EE, Mersinias V, Willemse J, Traag BA, Laing E, Chater KF, Smith CP, Koerten HK, van Wezel GP. 2007 Loss of the controlled localization of growth stage-specific cell-wall synthesis pleiotropically affects developmental gene expression in an *ssgA* mutant of *Streptomyces coelicolor*. *Mol. Microbiol.* **64**, 1244-1259.
8. Willemse J, Borst JW, de Waal E, Bisseling T, van Wezel GP. 2011 Positive control of cell division: FtsZ is recruited by SsgB during sporulation of *Streptomyces*. *Genes Dev.* **25**, 89-99.
9. Larson JL, Hershberger CL. 1986 The minimal replicon of a streptomycete plasmid produces an ultrahigh level of plasmid DNA. *Plasmid*. **15**, 199-209.
10. Karimova G, Pidoux J, Ullmann A, Ladant D. 1998 A bacterial two-hybrid system based on a reconstituted signal transduction pathway. *Proc. Natl. Acad. Sci. U. S. A.* **95**, 5752-5756.
11. Bierman M, Logan R, O'Brien K, Seno ET, Nagaraja Rao R, Schonher BE. 1992 Plasmid cloning vectors for the conjugal transfer of DNA from *Escherichia coli* to *Streptomyces* spp. *Gene*. **116**, 43-49.
12. Fedoryshyn M, Welle E, Bechthold A, Luzhetskyy A. 2008 Functional expression of the Cre recombinase in actinomycetes. *Appl. Microbiol. Biotechnol.* **78**, 1065-1070.
13. Vara J, Lewandowska-Skarbek M, Wang YG, Donadio S, Hutchinson CR. 1989 Cloning of genes governing the deoxysugar portion of the erythromycin biosynthesis pathway in *Saccharopolyspora erythraea* (*Streptomyces erythreus*). *J. Bacteriol.* **171**, 5872-5881.
